# Supplementary material
Source: PubMed Central journal article supplement (PMC6766788)
Supplement: CPT-106-632-s002.pdf [file CPT-106-632-s002.pdf]

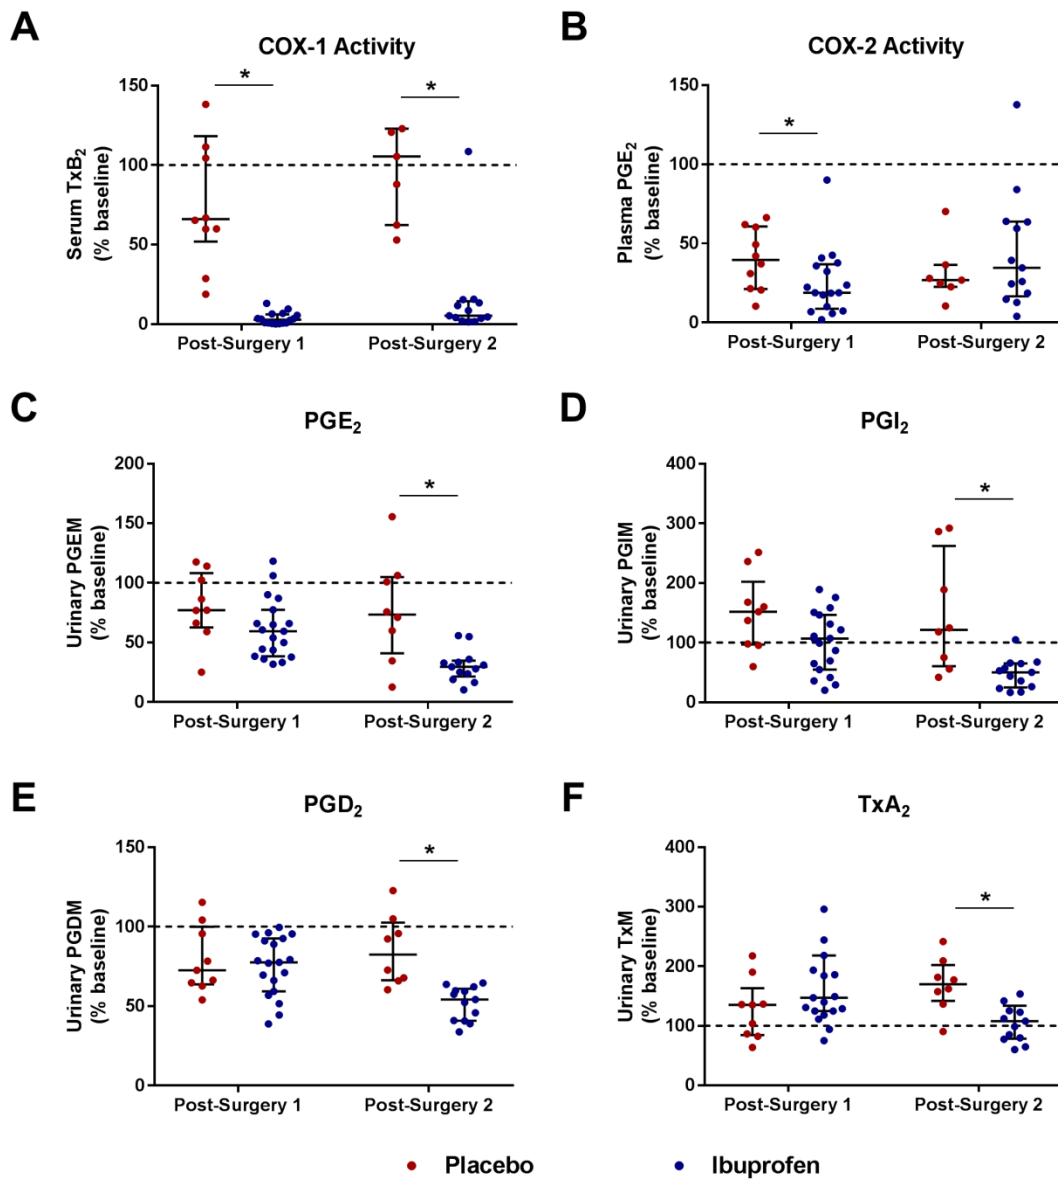

**Figure S2.** Comparison of COX-1 and COX-2 activity ex vivo and PG urinary metabolite levels after surgery in placebo (red) and ibuprofen-treated (blue) subjects. \* $p < 0.05$  by Wilcoxon rank-sum test
