# Supplementary material
Source: PubMed Central journal article supplement (PMC6766788)
Supplement: CPT-106-632-s003.pdf [file CPT-106-632-s003.pdf]

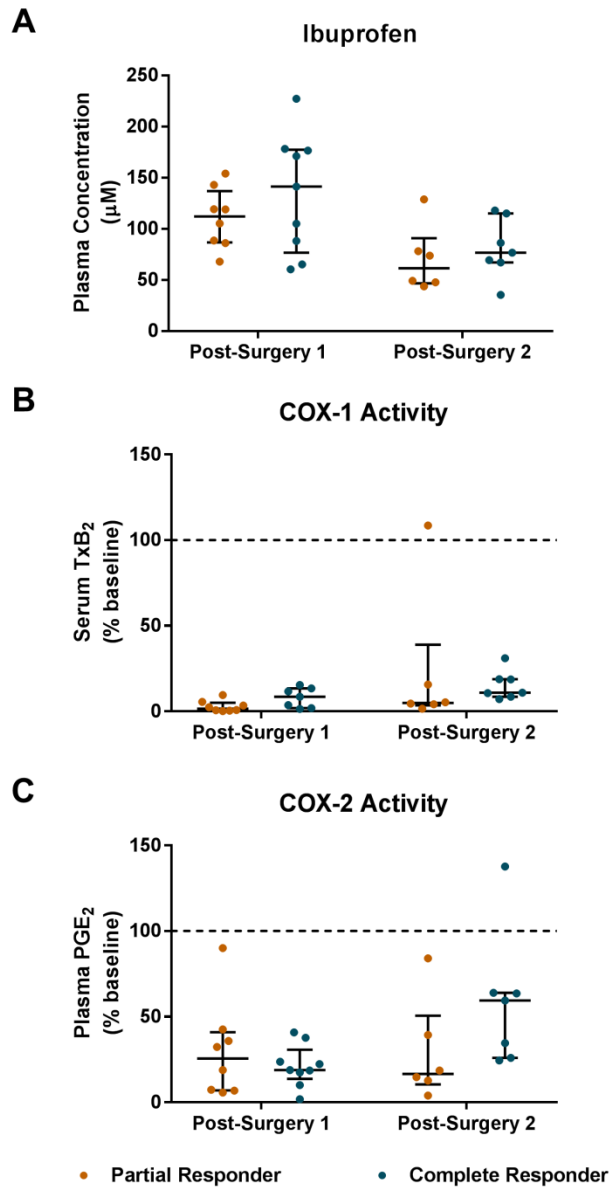

**Figure S3.** Comparison of ibuprofen plasma concentrations and COX-1 and COX-2 activity ex vivo after surgery in partial (gold) and complete (teal) responders.
