# Supplementary material
Source: PubMed Central journal article supplement (PMC6766788)
Supplement: CPT-106-632-s004.pdf [file CPT-106-632-s004.pdf]

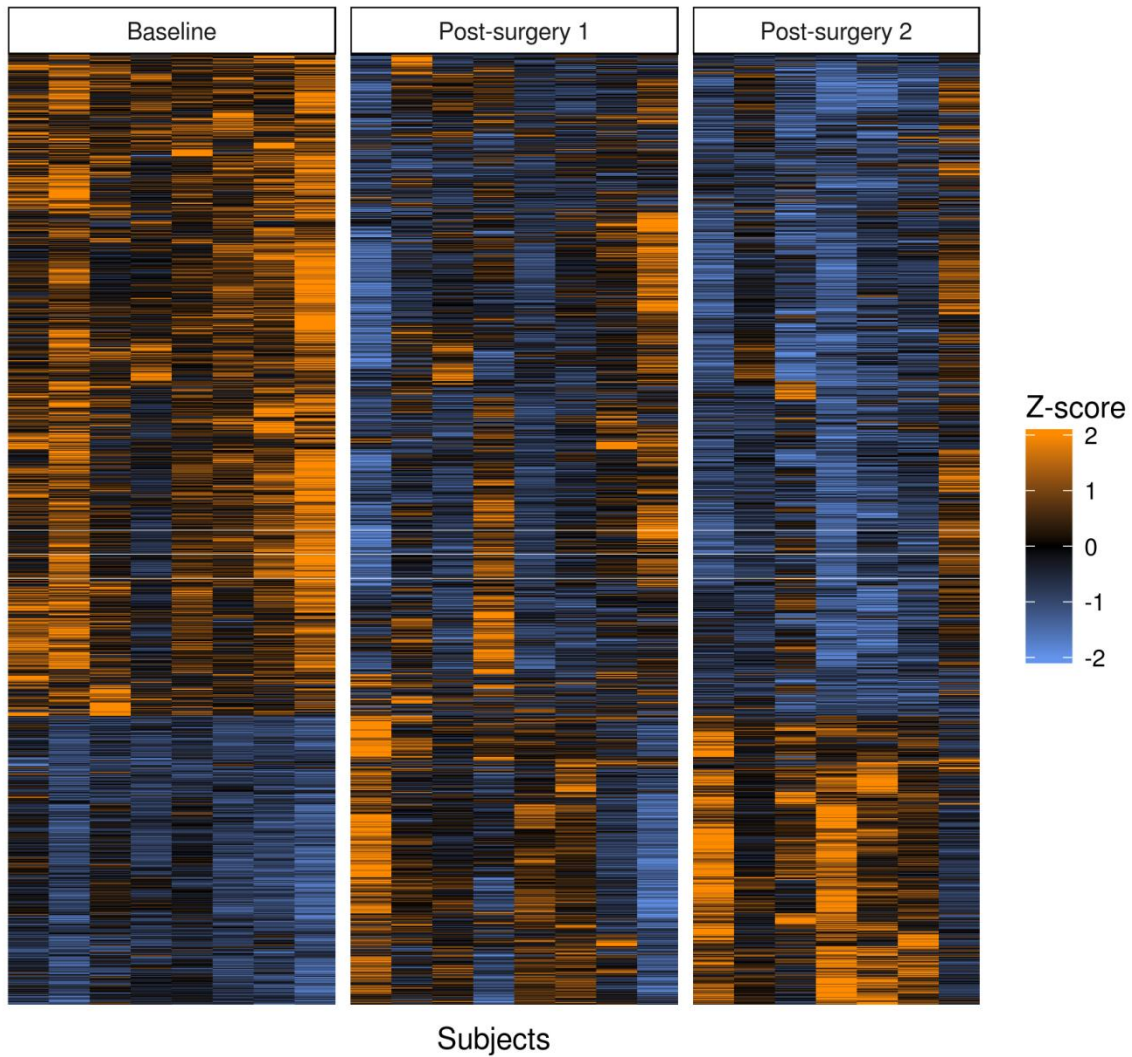

| Pathway Name                                                | p-value               |
|-------------------------------------------------------------|-----------------------|
| Phagosome Formation                                         | $1.41 \times 10^{-8}$ |
| iCOS-iCOSL Signaling in T Helper Cells                      | $3.01 \times 10^{-8}$ |
| CD28 Signaling in T Helper Cells                            | $5.98 \times 10^{-8}$ |
| Role of Macrophages, Fibroblasts and Endothelial Cell in RA | $6.31 \times 10^{-8}$ |
| Role of NFAT in Regulation of Immune Response               | $1.40 \times 10^{-7}$ |

**Fig. S4.** Heatmap and pathway analysis of genes (rows) differentially expressed at the second post-surgery time point compared to baseline in the placebo group. Columns represent individual subjects. The table shows pathway enrichment (RA: Rheumatoid Arthritis)
