# Supplementary material
Source: PubMed Central journal article supplement (PMC6766788)
Supplement: CPT-106-632-s005.pdf [file CPT-106-632-s005.pdf]

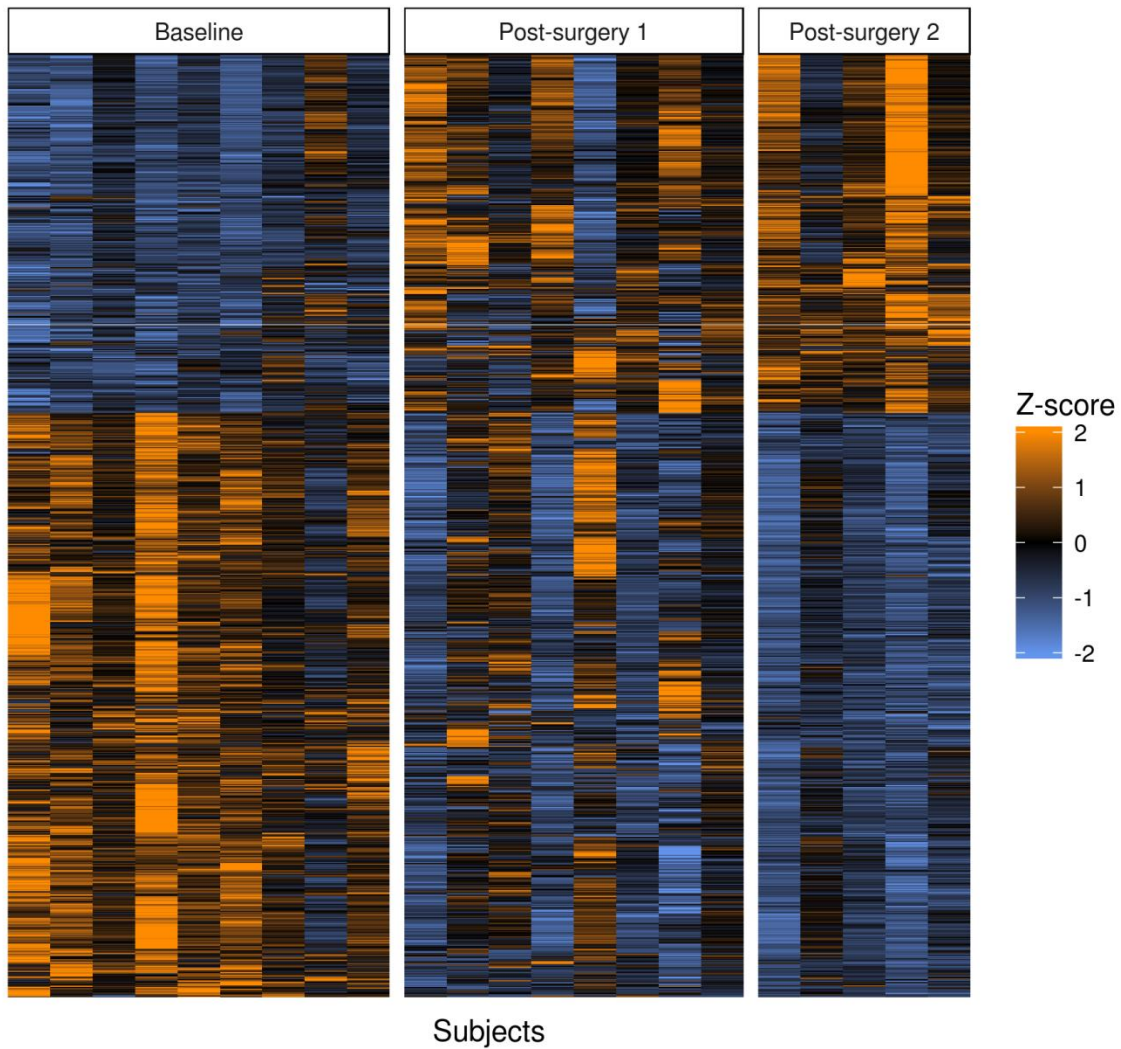

| Pathway Name                                                   | p-value                 |
|----------------------------------------------------------------|-------------------------|
| G <sub>i</sub> Signaling                                       | 8.85 x 10 <sup>-5</sup> |
| Toll-like Receptor Signaling                                   | 1.66 x 10 <sup>-4</sup> |
| Fc Receptor-mediated Phagocytosis in Macrophages and Monocytes | 2.58 x 10 <sup>-4</sup> |
| LXR/RXR Activation                                             | 2.63 x 10 <sup>-4</sup> |
| Integrin Signaling                                             | 3.78 x 10 <sup>-4</sup> |

**Figure S5.** Heatmap and pathway analysis of genes (rows) differentially expressed at the second post-surgery time point compared to baseline in the partial responders. Columns represent individual subjects
