# Supplementary material
Source: PubMed Central journal article supplement (PMC6766788)
Supplement: CPT-106-632-s006.pdf [file CPT-106-632-s006.pdf]

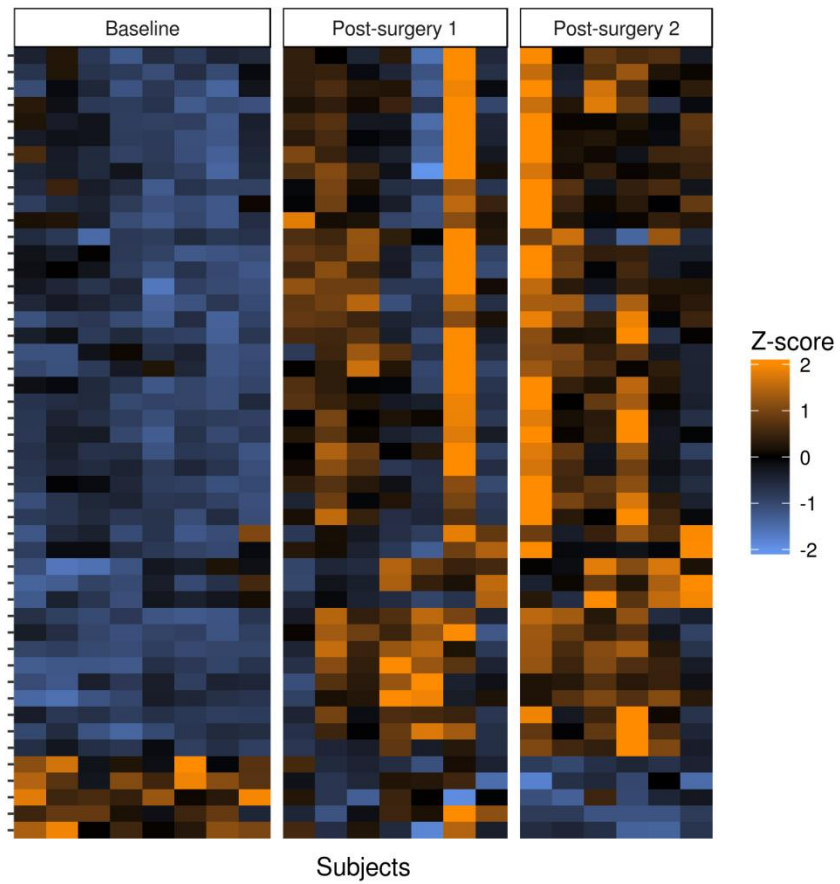

| Pathway Name                   | p-value               |
|--------------------------------|-----------------------|
| Il-9 Signaling                 | $2.28 \times 10^{-6}$ |
| STAT3 Pathway                  | $6.19 \times 10^{-5}$ |
| Th2 Pathway                    | $2.64 \times 10^{-4}$ |
| Role of IL-17A in Psoriasis    | $3.25 \times 10^{-4}$ |
| Th1 and Th2 Activation Pathway | $5.85 \times 10^{-4}$ |

**Figure S6.** Heatmap and pathway analysis of genes (rows) differentially expressed at the second post-surgery time point compared to baseline in the complete responders. Columns represent individual subjects.
