# Supplementary material
Source: PubMed Central journal article supplement (PMC6766788)
Supplement: CPT-106-632-s007.pdf [file CPT-106-632-s007.pdf]

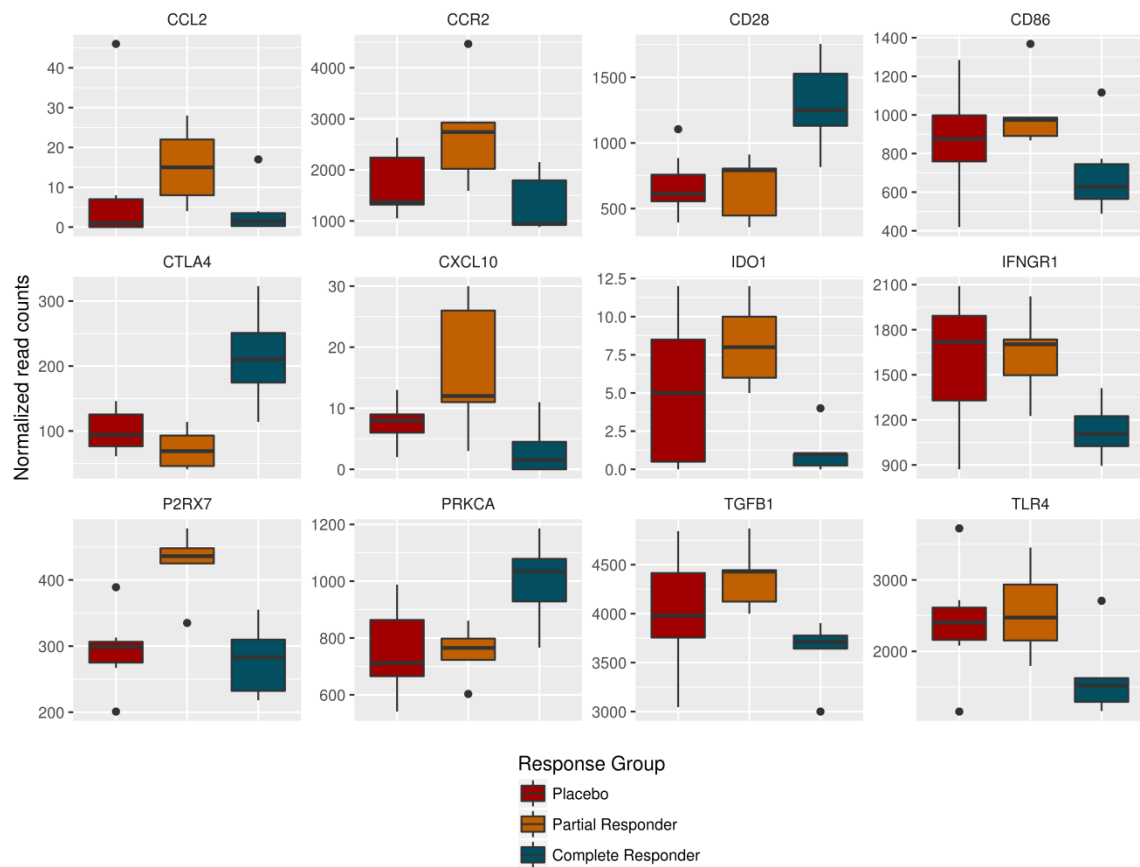

**Figure S7.** Expression of select genes detected by RNA-seq at the second post-surgery time point. Genes were selected from enriched pathways from differential expression analysis between partial and complete responders. Boxplots show median with interquartile range.
